# Supplementary material
Source: PubMed Central journal article supplement (PMC3152441)

# SUPPL. TABLE 1

| 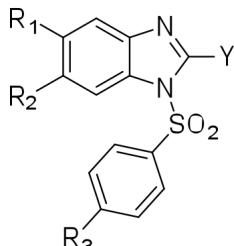 |          |   |                |                |                 |                 |   | Compound Selectivity for Inhibition of NF-κB Activation Pathways <sup>b</sup> |                                         |                                          |                                      |                                               |                                                        |
|-----------------------------------------------------------------------------------|----------|---|----------------|----------------|-----------------|-----------------|---|-------------------------------------------------------------------------------|-----------------------------------------|------------------------------------------|--------------------------------------|-----------------------------------------------|--------------------------------------------------------|
| #                                                                                 | CID      | * | R <sub>1</sub> | R <sub>2</sub> | R <sub>3</sub>  | Y               | n | NOD1 IC <sub>50</sub> (uM) <sup>a</sup>                                       | NOD2 IC <sub>50</sub> (uM) <sup>a</sup> | TNF-α IC <sub>50</sub> (uM) <sup>a</sup> | γ-tri-DAP NOD1 IC <sub>50</sub> (uM) | PMA/Ionomycin <sup>b</sup> %act @ (0.25-25uM) | Doxorubicin DNA damage <sup>b</sup> %act @ (0.25-25uM) |
| 1                                                                                 | 1088438  | P | H              | H              | Me              | NH <sub>2</sub> | 7 | 0.56±0.04                                                                     | >20                                     | >20                                      | n.d. <sup>§</sup>                    | n.d.                                          | n.d.                                                   |
|                                                                                   |          | S |                |                |                 |                 | 6 | 0.71±0.15                                                                     | >20                                     | >20                                      | 0.97                                 | 0                                             | 0                                                      |
| 2                                                                                 | 1088439  | P | H              | H              | Cl              | NH <sub>2</sub> | 2 | 0.48±0.14                                                                     | >20                                     | >20                                      | n.d.                                 | n.d.                                          | n.d.                                                   |
|                                                                                   |          | S |                |                |                 |                 | 2 | 0.09±0.01                                                                     | >20                                     | >20                                      | 1.08                                 | 0                                             | 0                                                      |
| 3                                                                                 | 44229066 | S | H              | H              | OMe             | NH <sub>2</sub> | 4 | 2.7±0.69                                                                      | >20                                     | >20                                      | 2.48                                 | 0                                             | 0                                                      |
| 4                                                                                 | 3025920  | S | H              | H              | H               | NH <sub>2</sub> | 4 | 2.2±0.21                                                                      | >20                                     | >20                                      | 5.24                                 | 0                                             | 0                                                      |
| 5                                                                                 | 746711   | P | H              | H              | Me              | H               | 2 | 6.3±0.81                                                                      | >20                                     | >20                                      | 9.66                                 | 0                                             | 0                                                      |
| 6                                                                                 | 3025945  | S | H              | H              | NO <sub>2</sub> | NH <sub>2</sub> | 6 | 14±1.8                                                                        | >20                                     | >20                                      | >25                                  | 0                                             | 0                                                      |
| 7                                                                                 | 44229067 | S | Me             | Me             | Me              | NH <sub>2</sub> | 4 | >20                                                                           | >20                                     | >20                                      | >25                                  | 0                                             | 0                                                      |

\* S = Synthesized P = Purchased  
<sup>§</sup> n.d.=Not determined  
<sup>a</sup> Potency (uM) mean ± S.E.M., (n = replicates)  
<sup>b</sup> For the NF-κB Pathway specificity assays all compounds were tested at 0.25, 1.0, 2.5, 5.0, 10 & 25 uM

# SUPPL. FIG.1

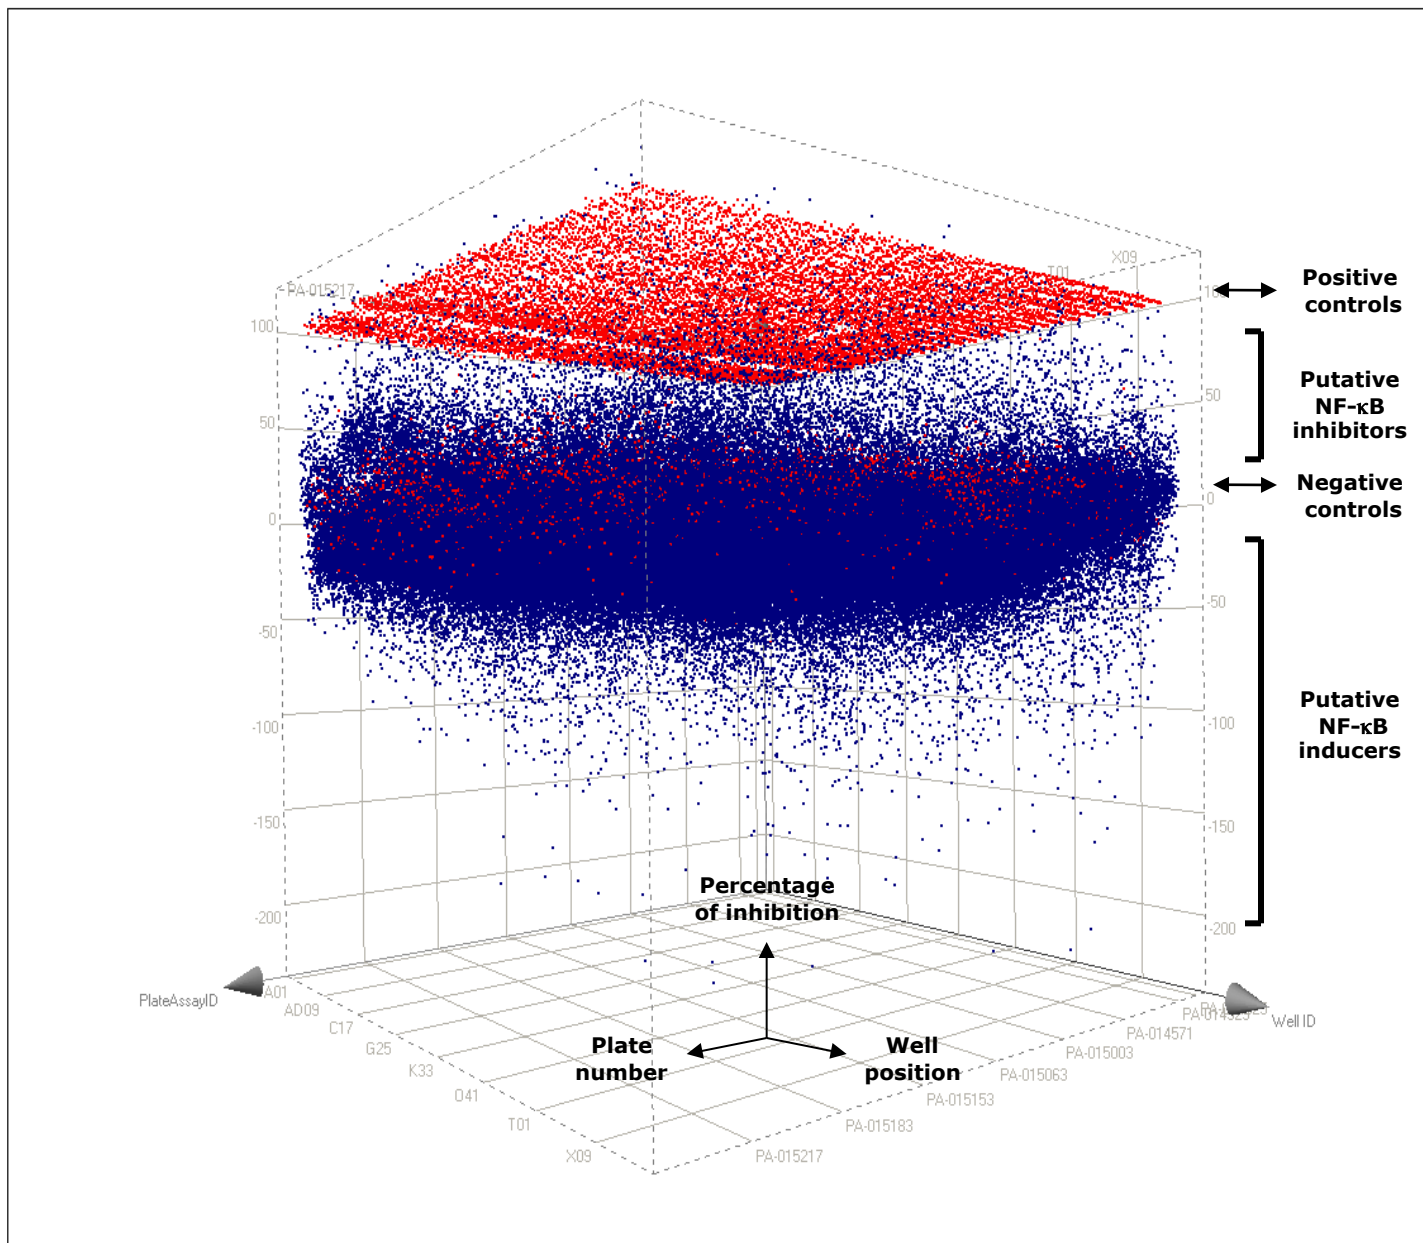

# SUPPL. FIG.2

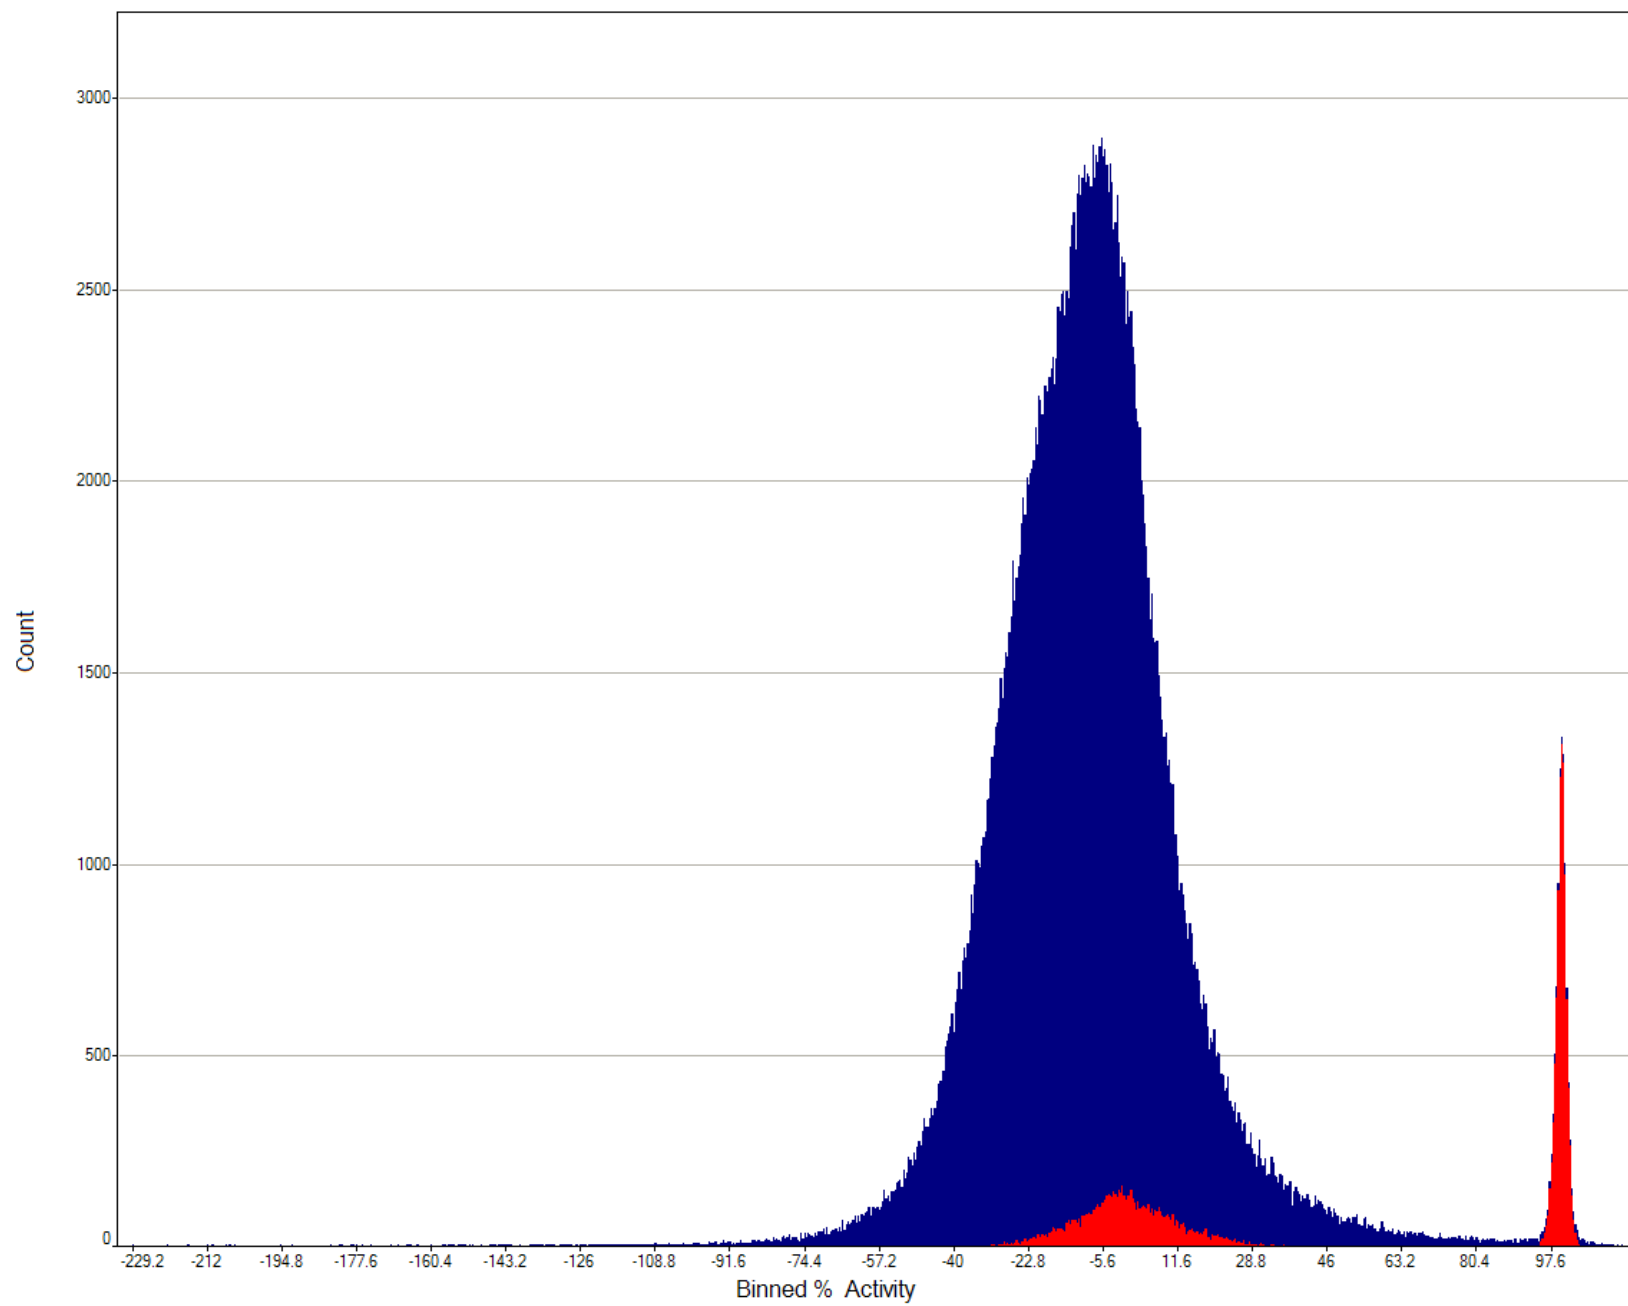

# SUPPL. FIG.3

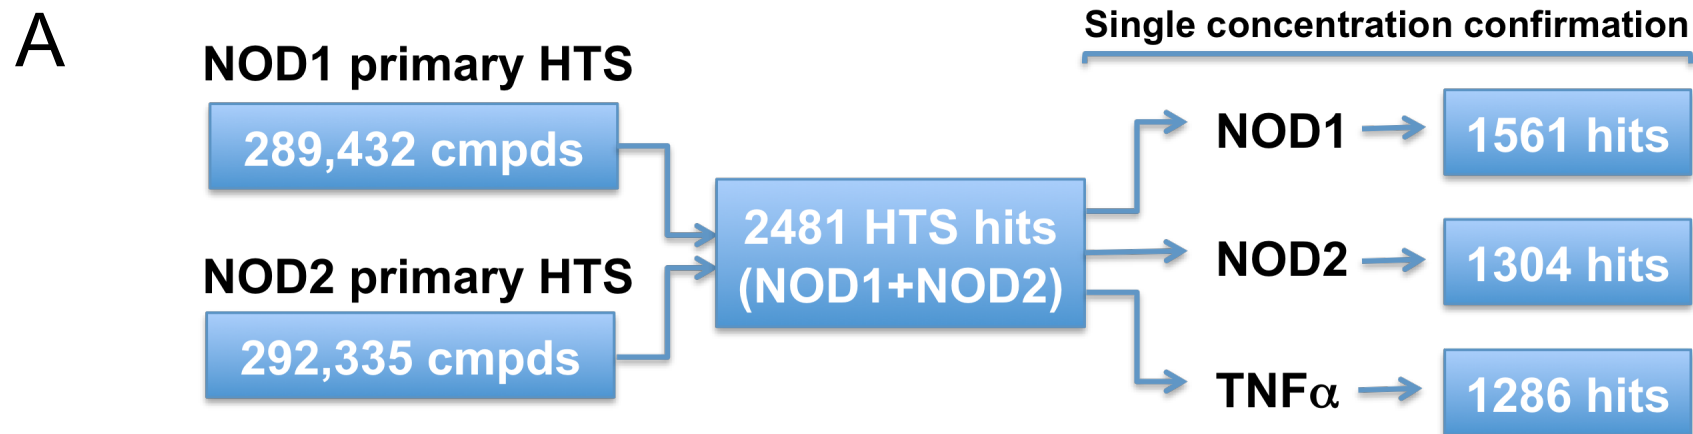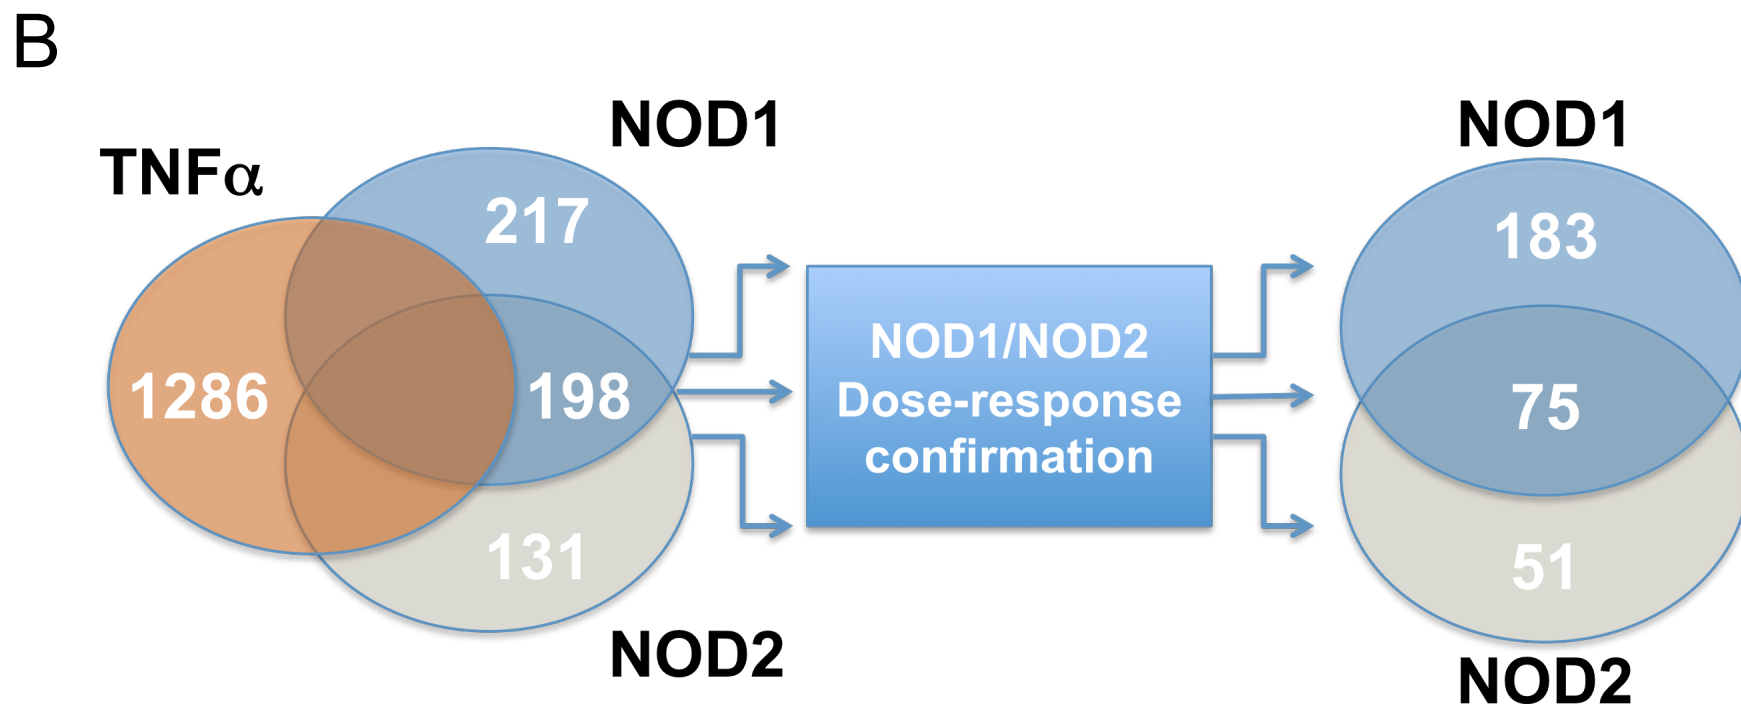

# SUPPL. FIG.4

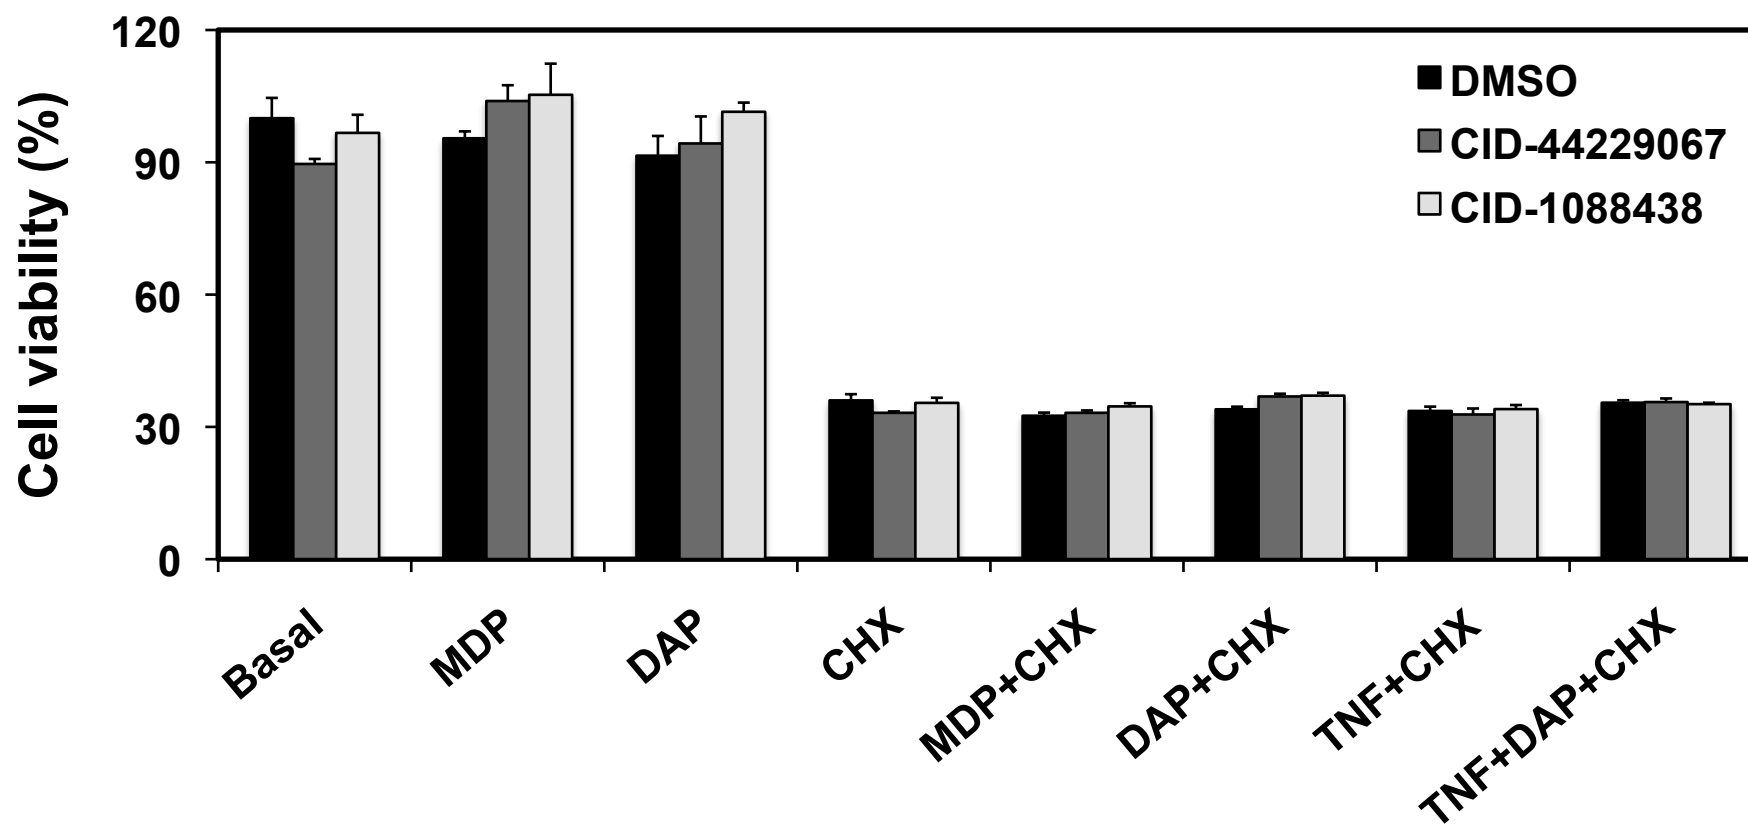

# SUPPL. FIG.5

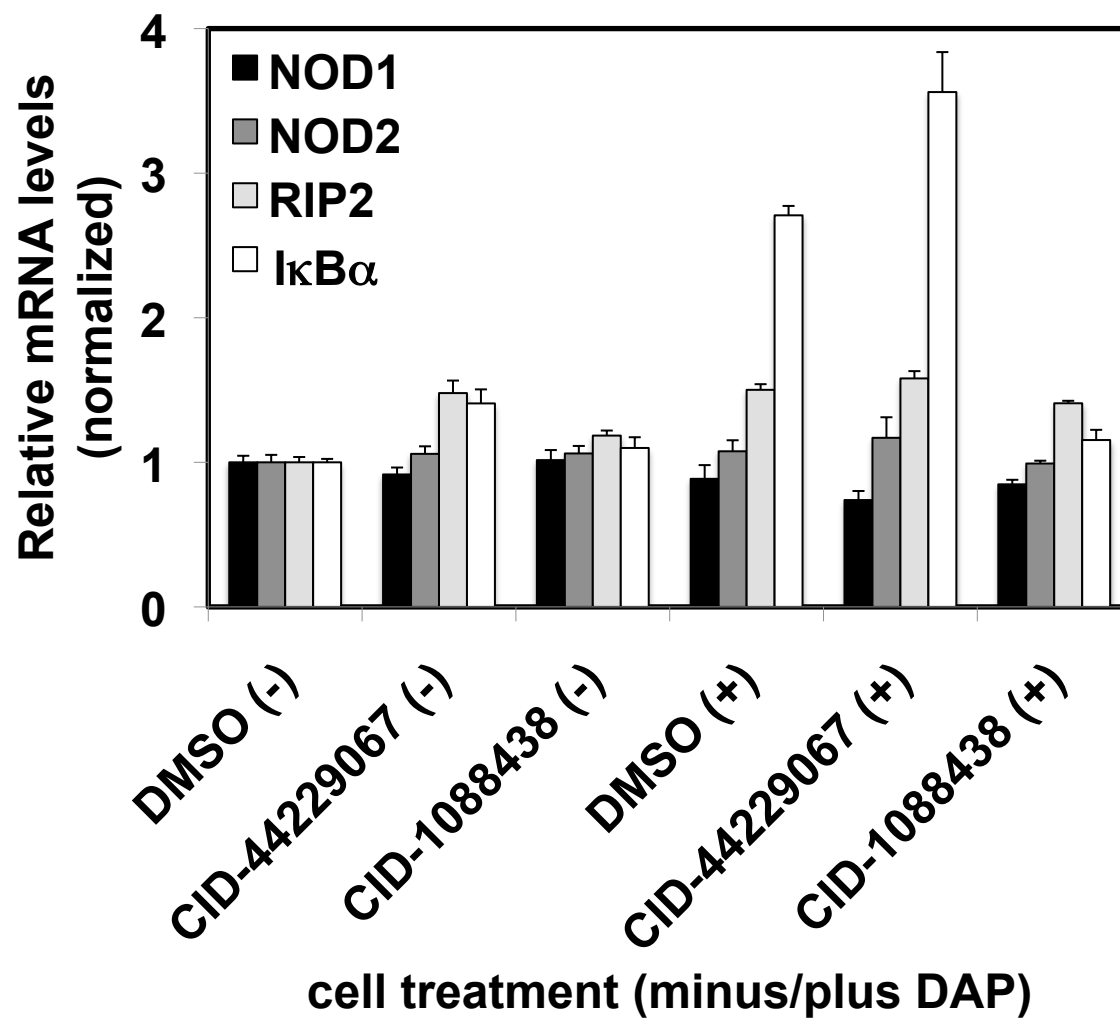

# SUPPL. FIG.6

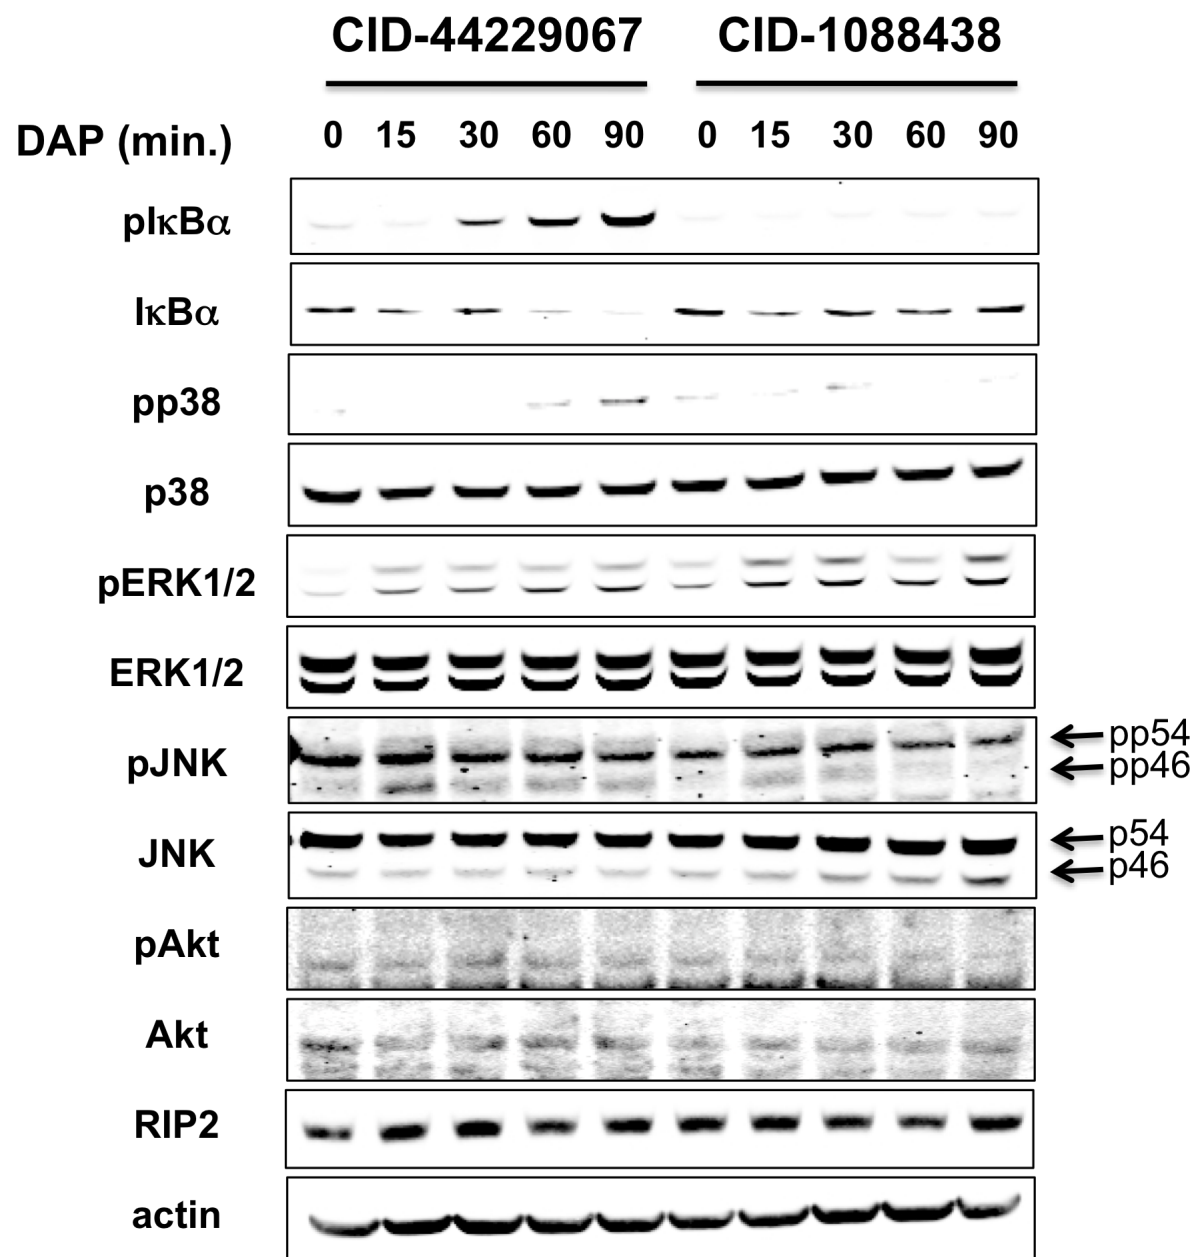

# SUPPL. FIG.7

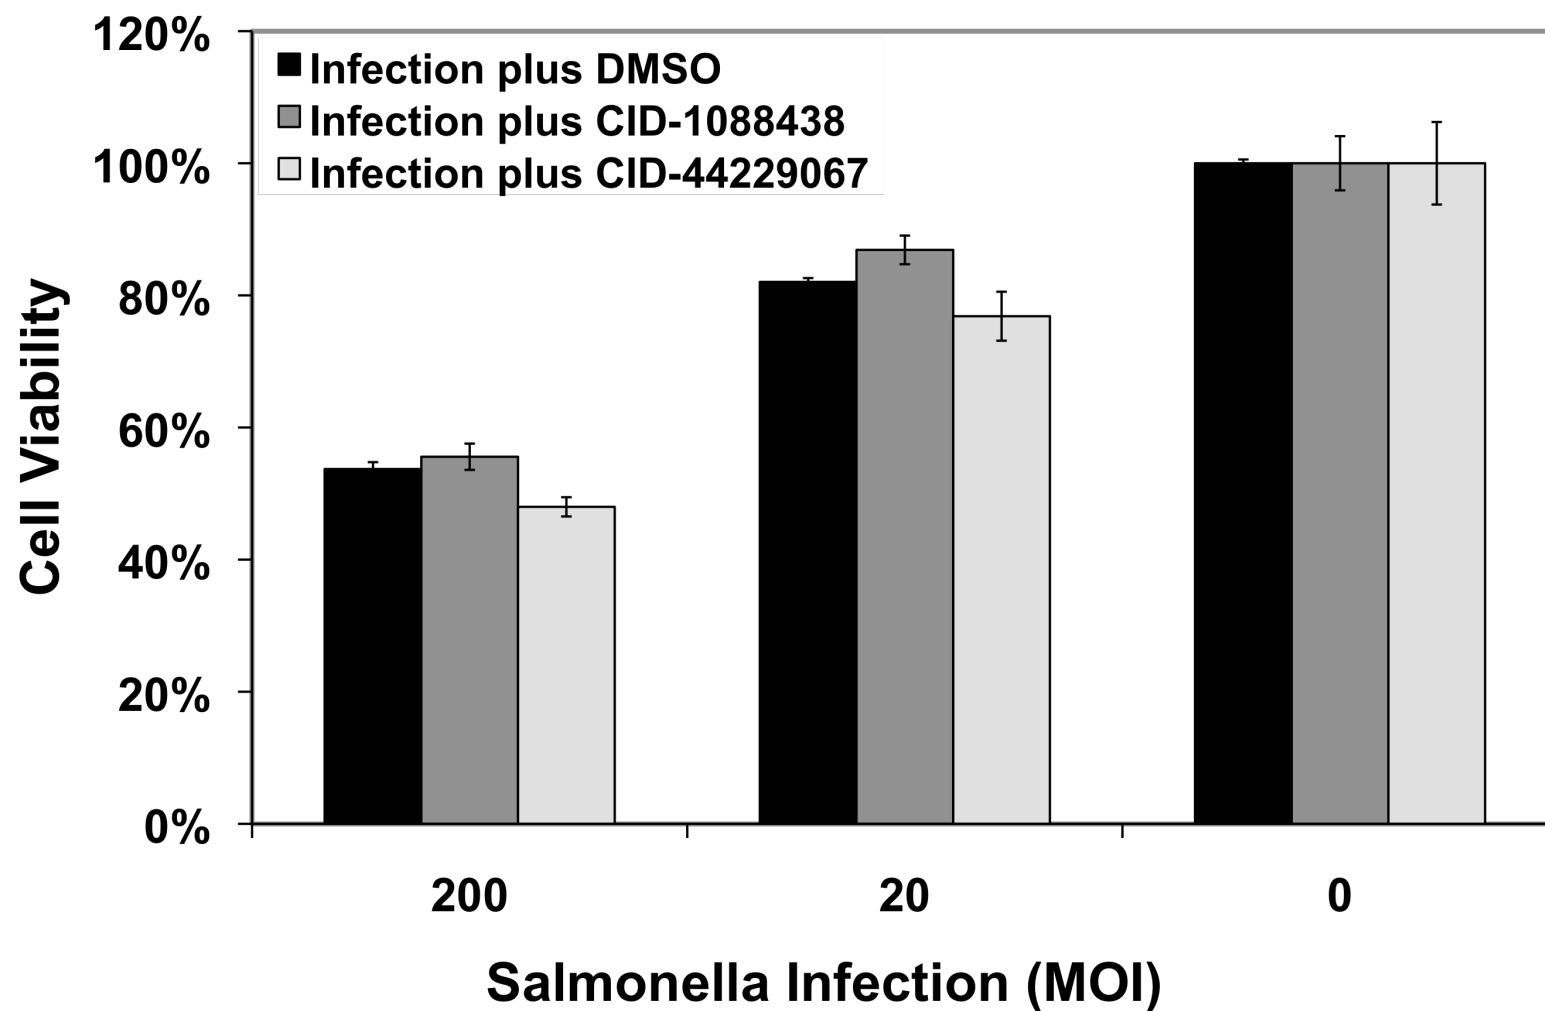



# SUPPL. FIG.8

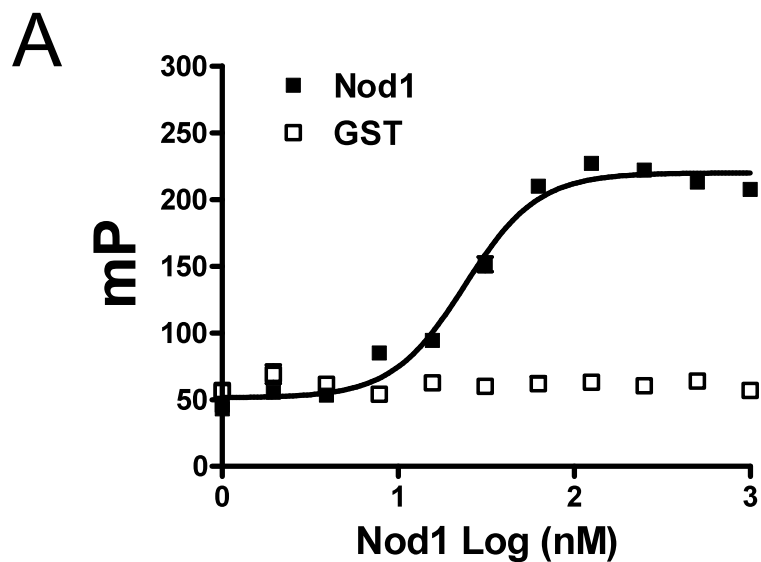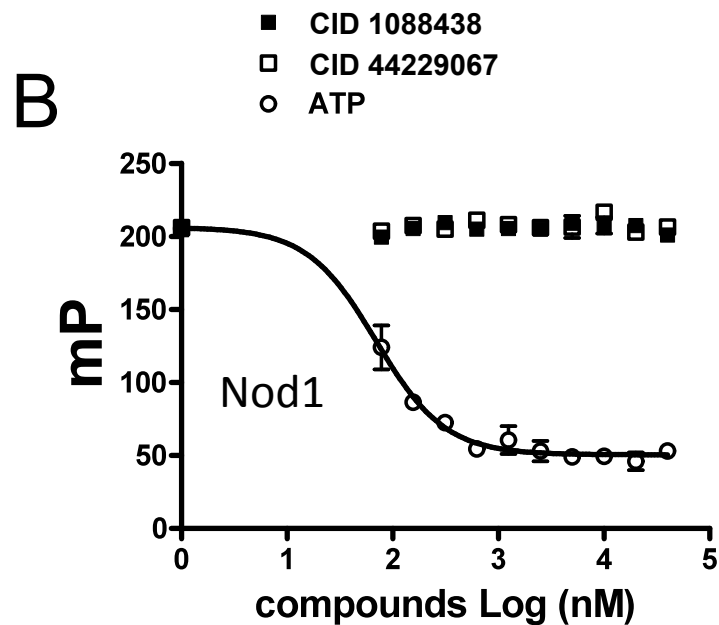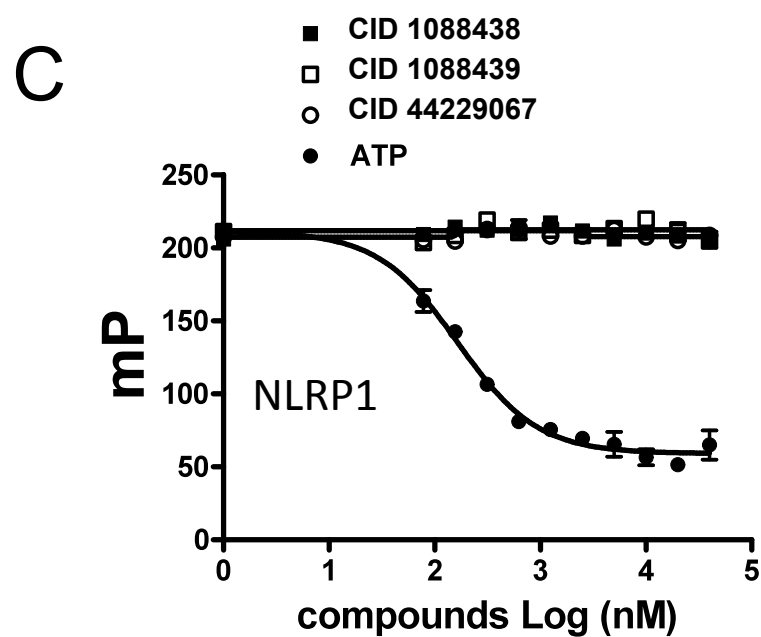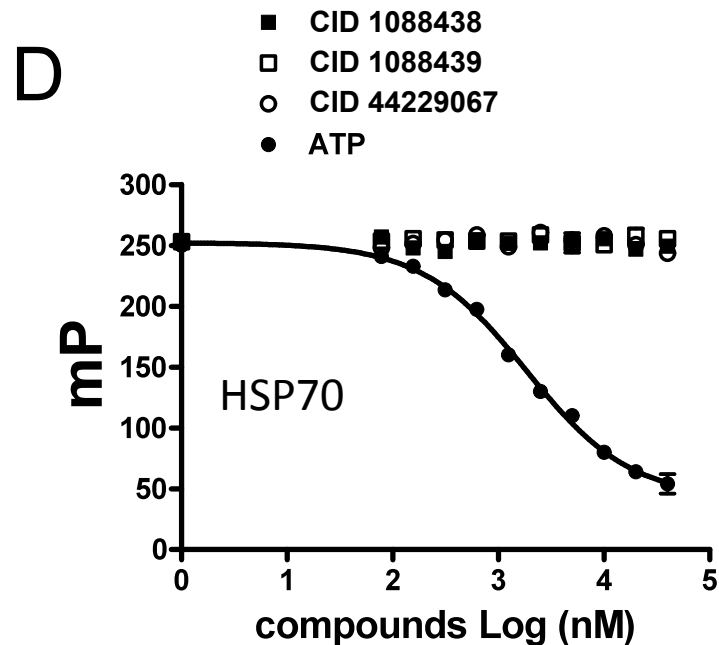

# SUPPL. FIG.9

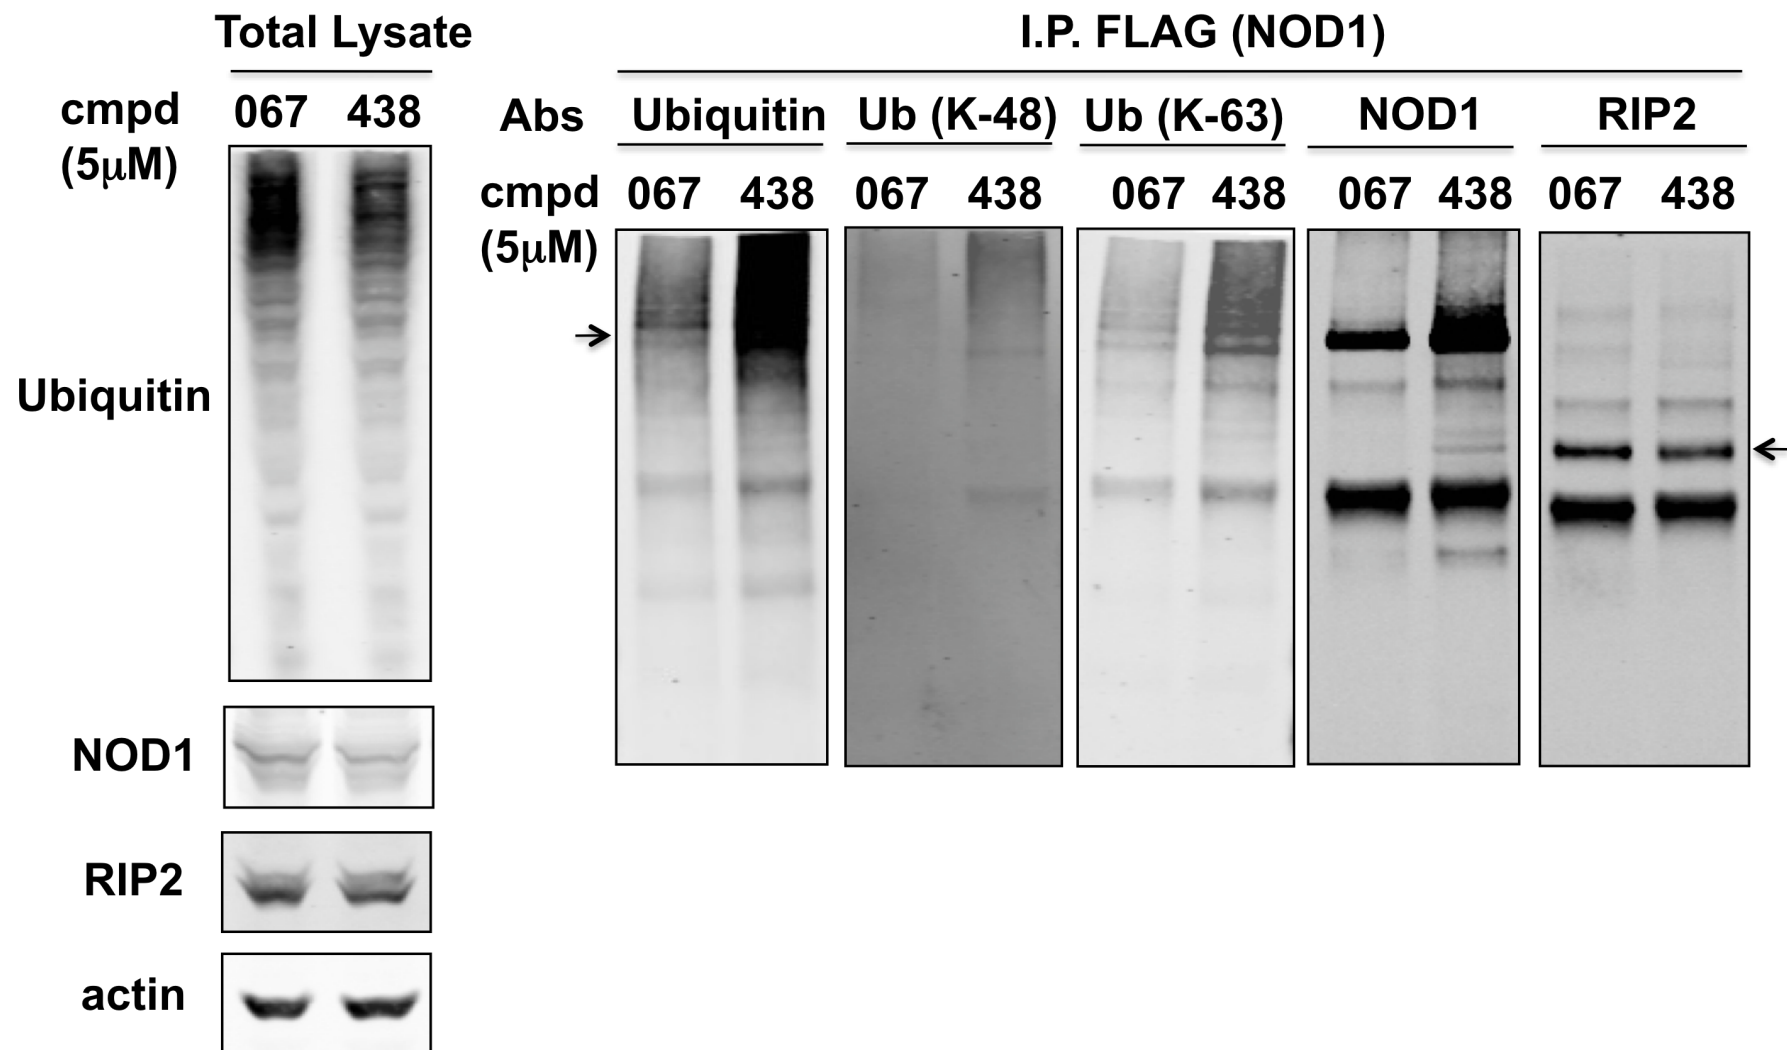

# SUPPL. FIG.10

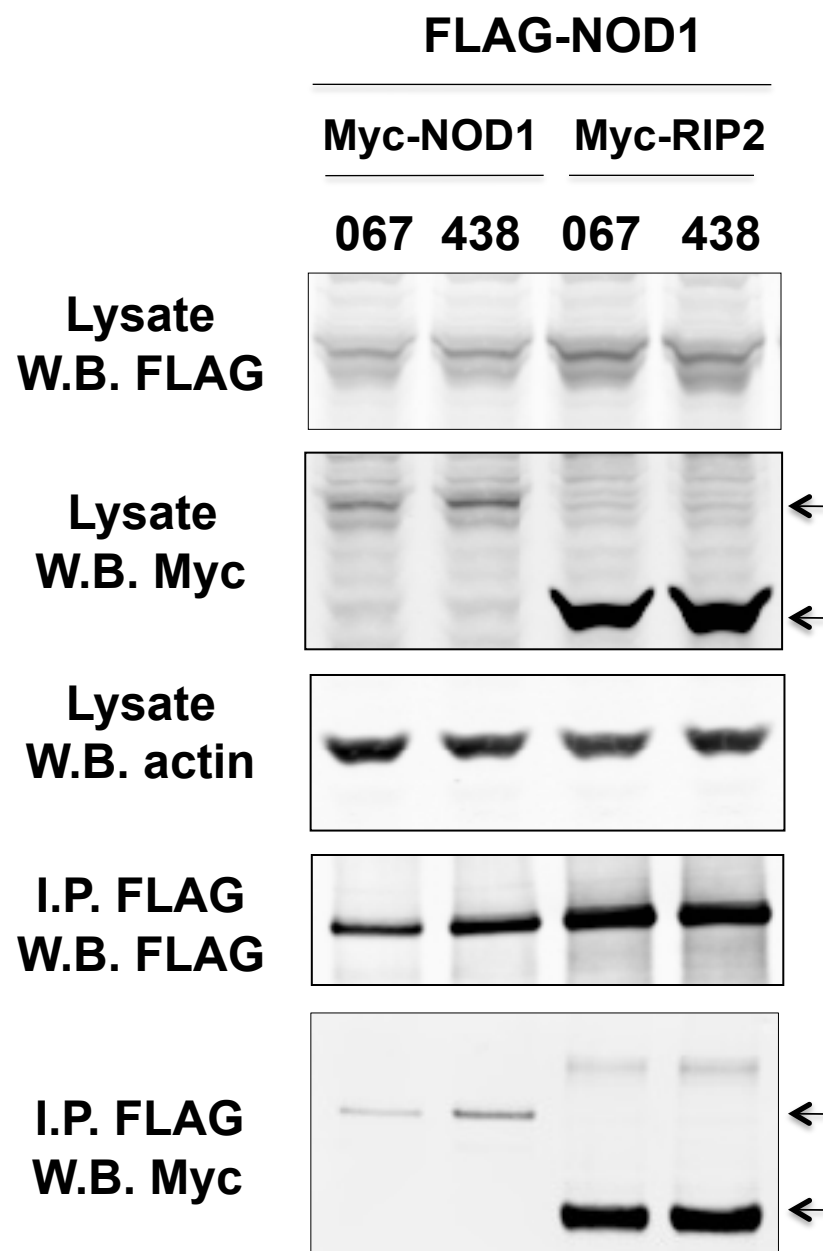

# SUPPL. FIG.11

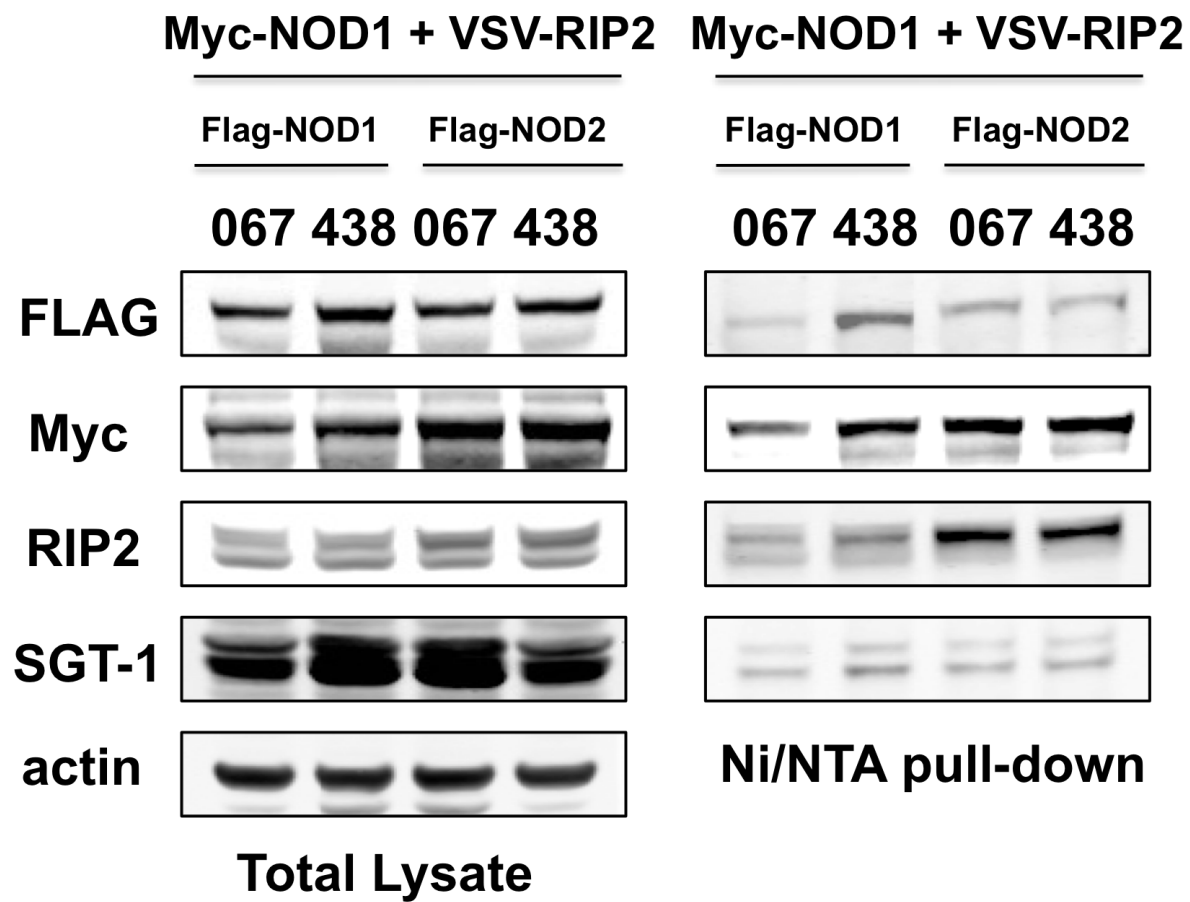

# SUPPL. FIG.12

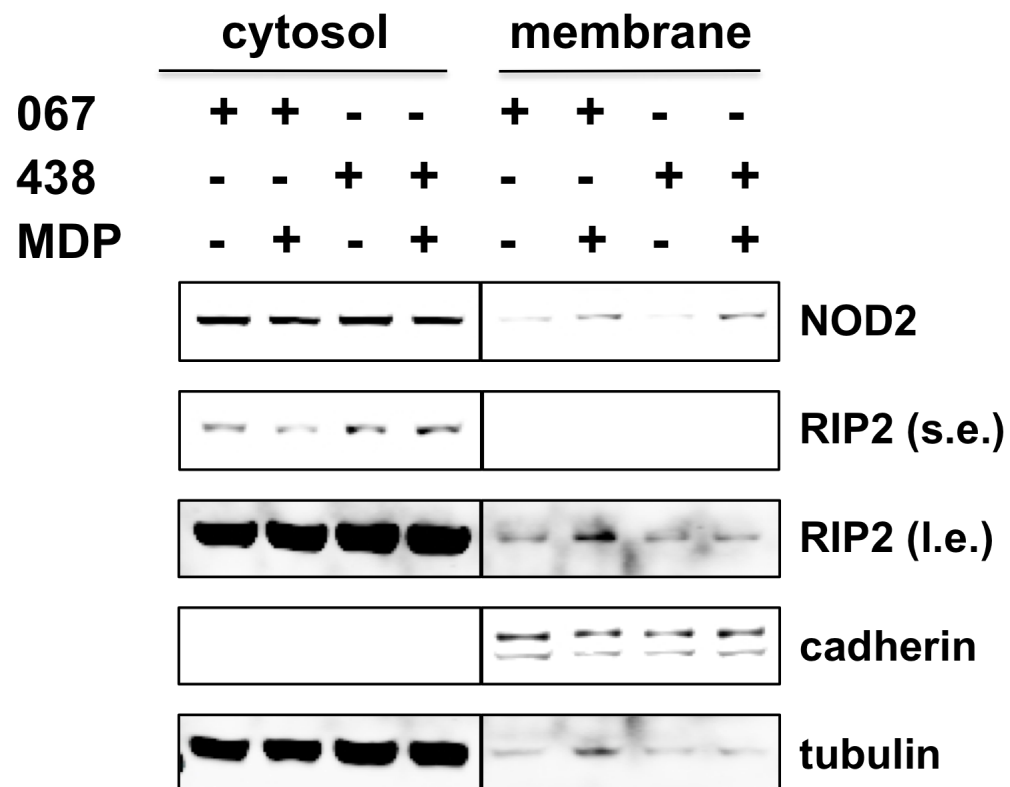

Supplement: NIHMS309513-supplement-2.pdf [file NIHMS309513-supplement-2.pdf]
